# Supplementary material
Source: Elsevier journal article supplement (https://authors.library.caltech.edu/35479/3/mmc2.pdf)
Supplement: mmc2 [file mmc2.pdf]

Table 2. Single grain  $^4\text{He}$  diffusion data obtained from two Acapulco phosphate grains.

| Step                     | Temp.<br>(C) | Heating duration<br>(hours) | $^4\text{He}$<br>(ncc) | $f_{\text{cum}}$ | $\ln(D/a^2)$ | 10000/Temp.<br>(1/K) |
|--------------------------|--------------|-----------------------------|------------------------|------------------|--------------|----------------------|
| <i>Phosphate Grain 1</i> |              |                             |                        |                  |              |                      |
| Laser                    |              |                             |                        |                  |              |                      |
| 1                        | 100          | 1.02                        | 0.000117               | 1.3753E-05       | -34.9862     | 26.80965             |
| 2                        | 125          | 1.02                        | 0.001772               | 2.9039E-05       | -31.7917     | 25.12563             |
| 3                        | 150          | 1.00                        | 0.015547               | 0.00016318       | -28.1010     | 23.64066             |
| 4                        | 175          | 1.02                        | 0.081291               | 0.00086458       | -24.7868     | 22.32143             |
| 5                        | 200          | 1.00                        | 0.244287               | 0.00297235       | -22.3527     | 21.14165             |
| 6                        | 225          | 1.02                        | 0.636731               | 0.00846621       | -20.3189     | 20.08032             |
| 7                        | 250          | 1.02                        | 1.626224               | 0.02249767       | -18.3854     | 19.12046             |
| 8                        | 275          | 1.00                        | 3.799304               | 0.05527899       | -16.5662     | 18.24818             |
| 9                        | 300          | 1.02                        | 7.116156               | 0.11667892       | -15.1210     | 17.45201             |
| 10                       | 285          | 1.02                        | 1.903155               | 0.13309981       | -16.0357     | 17.92115             |
| 11                       | 265          | 2.02                        | 1.031620               | 0.14200088       | -17.2252     | 18.58736             |
| 12                       | 245          | 4.02                        | 0.558740               | 0.14682182       | -18.4725     | 19.30502             |
| 13                       | 325          | 1.02                        | 6.068151               | 0.19917931       | -14.5049     | 16.72241             |
| 14                       | 350          | 1.02                        | 6.178890               | 0.25249228       | -14.1690     | 16.05136             |
| 15                       | 375          | 1.00                        | 6.284857               | 0.30671955       | -13.8659     | 15.43210             |
| 16                       | 400          | 1.00                        | 7.145669               | 0.36837413       | -13.4838     | 14.85884             |
| 17                       | 450          | 1.00                        | 14.836600              | 0.49638793       | -12.3803     | 13.83126             |
| 18                       | 500          | 1.02                        | 21.000330              | 0.6775839        | -11.4843     | 12.93661             |
| Resistance Furnace       |              |                             |                        |                  |              |                      |
| 19                       | >500         | 6.02                        | 32.489700              | 0.95791295       | -11.5615     |                      |
| 20                       | >500         | 6.00                        | 4.877823               | 1.0000000        | -10.4709     |                      |
| <i>Phosphate Grain 2</i> |              |                             |                        |                  |              |                      |
| Laser                    |              |                             |                        |                  |              |                      |
| 1                        | 100          | 1.00                        | 0.000048               | 0.00000          | -39.2827     | 26.8097              |
| 2                        | 100          | 1.00                        | 0.000382               | 0.00001          | -34.9132     | 26.8097              |
| 3                        | 125          | 1.02                        | 0.001297               | 0.00002          | -32.2017     | 25.1256              |
| 4                        | 125          | 1.02                        | 0.001390               | 0.00004          | -31.3240     | 25.1256              |
| 5                        | 150          | 1.00                        | 0.007774               | 0.00014          | -28.5237     | 23.6407              |
| 6                        | 150          | 1.00                        | 0.006201               | 0.00021          | -28.0578     | 23.6407              |
| 7                        | 175          | 1.02                        | 0.038812               | 0.00070          | -25.2815     | 22.3214              |
| 8                        | 175          | 1.02                        | 0.025737               | 0.00102          | -25.0588     | 22.3214              |
| 9                        | 200          | 1.00                        | 0.112835               | 0.00242          | -22.8674     | 21.1416              |
| 10                       | 200          | 1.02                        | 0.075236               | 0.00336          | -22.7698     | 21.1416              |
| 11                       | 225          | 1.00                        | 0.288870               | 0.00696          | -20.8288     | 20.0803              |
| 12                       | 225          | 1.02                        | 0.207493               | 0.00954          | -20.7067     | 20.0803              |
| 13                       | 235          | 1.02                        | 0.319739               | 0.01352          | -19.9392     | 19.6850              |
| 14                       | 235          | 1.00                        | 0.262394               | 0.01679          | -19.8470     | 19.6850              |
| 15                       | 245          | 1.02                        | 0.428707               | 0.02213          | -19.1227     | 19.3050              |
| 16                       | 245          | 0.90                        | 0.319469               | 0.02611          | -19.0803     | 19.3050              |
| 17                       | 255          | 1.02                        | 0.603847               | 0.03363          | -18.3517     | 18.9394              |
| 18                       | 255          | 1.02                        | 0.524482               | 0.04017          | -18.2813     | 18.9394              |
| 19                       | 265          | 1.02                        | 0.803359               | 0.05017          | -17.6163     | 18.5874              |
| 20                       | 265          | 1.02                        | 0.712676               | 0.05905          | -17.5385     | 18.5874              |
| 21                       | 250          | 2.02                        | 0.512794               | 0.06544          | -18.4155     | 19.1205              |
| 22                       | 250          | 2.02                        | 0.469635               | 0.07129          | -18.4045     | 19.1205              |

|    |     |      |          |         |          |         |
|----|-----|------|----------|---------|----------|---------|
| 23 | 240 | 2.02 | 0.242427 | 0.07431 | -18.9992 | 19.4932 |
| 24 | 240 | 2.02 | 0.229175 | 0.07716 | -19.0134 | 19.4932 |
| 25 | 230 | 2.02 | 0.117787 | 0.07863 | -19.6491 | 19.8807 |
| 26 | 230 | 2.02 | 0.116014 | 0.08007 | -19.6445 | 19.8807 |
| 27 | 220 | 4.00 | 0.116470 | 0.08153 | -20.3060 | 20.2840 |
| 28 | 220 | 4.02 | 0.112103 | 0.08292 | -20.3297 | 20.2840 |
| 29 | 230 | 1.00 | 0.073422 | 0.08384 | -19.3475 | 19.8807 |
| 30 | 240 | 1.02 | 0.102727 | 0.08512 | -19.0142 | 19.4932 |
| 31 | 250 | 1.02 | 0.187883 | 0.08746 | -18.3877 | 19.1205 |
| 32 | 260 | 1.02 | 0.333312 | 0.09161 | -17.7747 | 18.7617 |
| 33 | 270 | 1.02 | 0.559713 | 0.09858 | -17.1913 | 18.4162 |
| 34 | 280 | 1.02 | 0.878171 | 0.10952 | -16.6431 | 18.0832 |
| 35 | 290 | 1.02 | 1.267914 | 0.12531 | -16.1431 | 17.7620 |
| 36 | 300 | 1.02 | 1.725973 | 0.14681 | -15.6705 | 17.4520 |
| 37 | 310 | 1.00 | 2.143186 | 0.17350 | -15.2522 | 17.1527 |
| 38 | 320 | 1.02 | 2.468689 | 0.20425 | -14.9351 | 16.8634 |
| 39 | 330 | 1.00 | 2.697286 | 0.23785 | -14.6412 | 16.5837 |
| 40 | 340 | 1.02 | 2.946623 | 0.27455 | -14.3857 | 16.3132 |
| 41 | 350 | 1.02 | 3.069827 | 0.31279 | -14.1681 | 16.0514 |
| 42 | 360 | 1.02 | 3.253815 | 0.35332 | -13.9394 | 15.7978 |
| 43 | 370 | 1.02 | 3.321355 | 0.39469 | -13.7538 | 15.5521 |
| 44 | 380 | 1.02 | 3.330533 | 0.43617 | -13.5929 | 15.3139 |
| 45 | 390 | 1.02 | 3.432884 | 0.47893 | -13.4081 | 15.0830 |
| 46 | 400 | 1.02 | 3.429511 | 0.52165 | -13.2562 | 14.8588 |
| 47 | 410 | 1.02 | 3.359348 | 0.56349 | -13.1273 | 14.6413 |
| 48 | 420 | 1.02 | 3.428892 | 0.60620 | -12.9564 | 14.4300 |
| 49 | 430 | 1.02 | 3.466005 | 0.64937 | -12.7897 | 14.2248 |
| 50 | 440 | 1.02 | 3.485696 | 0.69279 | -12.6204 | 14.0252 |
| 51 | 450 | 1.02 | 3.593622 | 0.73755 | -12.4124 | 13.8313 |
| 52 | 450 | 1.00 | 2.848225 | 0.77302 | -12.4529 | 13.8313 |
| 53 | 450 | 1.00 | 2.205625 | 0.80050 | -12.5562 | 13.8313 |
| 54 | 450 | 1.00 | 1.853720 | 0.82359 | -12.5937 | 13.8313 |
| 55 | 450 | 1.00 | 1.640462 | 0.84402 | -12.5844 | 13.8313 |
| 56 | 500 | 1.02 | 2.969905 | 0.88101 | -11.7985 | 12.9366 |
| 57 | 500 | 1.00 | 1.843726 | 0.90398 | -12.0177 | 12.9366 |
| 58 | 500 | 1.02 | 1.569860 | 0.92353 | -11.9742 | 12.9366 |
| 59 | 500 | 1.02 | 1.455418 | 0.94166 | -11.8017 | 12.9366 |
| 60 | 500 | 1.02 | 1.066819 | 0.95495 | -11.8475 | 12.9366 |
| 61 | 500 | 1.00 | 0.819513 | 0.96515 | -11.8370 | 12.9366 |
| 62 | 500 | 2.02 | 0.808940 | 0.97523 | -12.2544 | 12.9366 |
| 63 | 500 | 2.02 | 0.509180 | 0.98157 | -12.3976 | 12.9366 |
| 64 | 500 | 2.00 | 0.381177 | 0.98632 | -12.3821 | 12.9366 |
| 65 | 500 | 2.02 | 0.336793 | 0.99051 | -12.1840 | 12.9366 |
| 66 | 500 | 2.00 | 0.582415 | 0.99777 | -10.8015 | 12.9366 |
| 67 | 500 | 2.02 | 0.179133 | 1.00000 | -8.8755  | 12.9366 |

#### Regression Results

Steps used: 1~12 from Phosphate 1; 1~36 from Phosphate 2

Ea: 44.2 kcal/mol

$\ln(D_0/a^2)$ : 24.1 /s
